# Supplementary material
Source: PubMed Central journal article supplement (PMC6537865)
Supplement: NIHMS1012144-supplement-1.pdf [file NIHMS1012144-supplement-1.pdf]

**TABLE S1** Traumatic Exposures Assessed in Present Study

1. Have you ever been shot?
2. Have you ever been stabbed?
3. Have you ever been mugged or threatened with a weapon or experienced a break-in or robbery?
4. Have you ever been raped or sexually assaulted by a relative?
5. Have you ever been raped or sexually assaulted by someone not related to you?
6. Have you ever been in a natural disaster like a fire, flood, earthquake, tornado, mudslide, or hurricane?
7. Have you ever been held captive, tortured, or kidnapped?
8. Have you ever been diagnosed with a life threatening illness?
9. Have you ever been in a serious accident?
10. Have you ever seen someone being seriously injured or killed?
11. Have you ever unexpectedly discovered a dead body?

**Note:** Several traumatic exposures (eg, combat-related exposure) were excluded because they did not occur before 10 years of age. Importantly, age at occurrence of each event was recorded, and this information was used in the present study.

**TABLE S2** Pearson Correlation Coefficients

|                              | (1)    | (2)    | (3)    | (4)    | (5)     | (6)     | (7)    | (8)    | (9)     | (10)    | (11)   | (12)   | (13)   | (14)    |
|------------------------------|--------|--------|--------|--------|---------|---------|--------|--------|---------|---------|--------|--------|--------|---------|
| (1) Any trauma               | 1      | 0.81** | 0.39** | 0.44** | 0.02    | 0.05*   | 0.13** | 0.15** | 0.11**  | 0.06*   | 0.08** | 0.08** | 0.04   | 0.05*   |
| (2) Non-assaultive           | 0.81** | 1      | 0.07** | 0.06** | 0.01    | 0.03    | 0.04*  | 0.10** | 0.00    | 0.01    | 0.04   | 0.03   | 0.03   | 0.04    |
| (3) Assaultive               | 0.39** | 0.07** | 1      | 0.07** | 0.03    | 0.04*   | 0.09** | 0.10** | 0.03    | 0.01    | 0.09** | 0.08** | 0.03   | -0.01   |
| (4) Sexual assaultive        | 0.44** | 0.06** | 0.07** | 1      | 0.07**  | 0.09**  | 0.17** | 0.13** | 0.04*   | 0.02    | 0.07*  | 0.06*  | 0.02   | -0.15   |
| (5) DSM-5 AUD Sx             | 0.02   | 0.01   | 0.03   | 0.07** | 1       | 0.48**  | 0.23** | 0.30** | 0.28**  | 0.36**  | 0.24** | 0.28** | 0.31** | -0.09*  |
| (6) DSM-5 CUD Sx             | 0.05*  | 0.03   | 0.04*  | 0.09** | 0.48**  | 1       | 0.20** | 0.33** | 0.23**  | 0.43**  | 0.21** | 0.27** | 0.25** | -0.06** |
| (7) INT                      | 0.13** | 0.04*  | 0.09** | 0.17** | 0.23**  | 0.20**  | 1      | 0.20** | 0.10**  | 0.14**  | 0.13** | 0.10** | 0.09** | -0.02   |
| (8) EXT                      | 0.15** | 0.10** | 0.10** | 0.13** | 0.30**  | 0.33**  | 0.20** | 1      | 0.11**  | 0.18**  | 0.19** | 0.15** | 0.14** | -0.05*  |
| (9) Alcohol ever             | 0.11** | 0.00   | 0.03   | 0.04*  | 0.28**  | 0.23**  | 0.10** | 0.11** | 1       | 0.49**  | 0.19** | 0.02** | 0.16** | -0.17** |
| (10) Cannabis ever           | 0.06*  | 0.01   | 0.01   | 0.02   | 0.36**  | 0.43**  | 0.14** | 0.18** | 0.49**  | 1       | 0.30** | 0.24** | 0.32** | -0.10** |
| (11) Parent AUD              | 0.08** | 0.04   | 0.09** | 0.07*  | 0.24**  | 0.21**  | 0.13** | 0.18** | 0.19**  | 0.30**  | 1      | 0.14** | 0.08*  | -0.03   |
| (12) BIS total score         | 0.08** | 0.03   | 0.08** | 0.06*  | 0.28**  | 0.27**  | 0.10** | 0.15** | 0.02**  | 0.24**  | 0.14** | 1      | 0.35** | -0.03   |
| (13) SSS total score         | 0.04   | 0.03   | 0.03   | 0.02   | 0.31**  | 0.25**  | 0.09** | 0.14** | 0.16**  | 0.32**  | 0.08*  | 0.35** | 1      | -0.04   |
| (14) No-go frontal theta ERO | 0.05*  | 0.04   | -0.01  | -0.15  | -0.09** | -0.06** | -0.02  | -0.05* | -0.17** | -0.10** | -0.03  | -0.03  | -0.04  | 1       |

**Note:** AUD = alcohol use disorder; BIS = Barratt Impulsiveness Scale; CUD = cannabis use disorder; ERO = event-related oscillations; EXT = externalizing; INT = internalizing; SSS = Sensation Seeking Scale; sx = symptom.

\* $p < .05$ ; \*\* $p < .01$ .

**TABLE S3** Early Trauma Exposure and Go/No Go Task Performance and Behavior

|                  | Non-Assaultive Trauma<br>< 10 y (n = 418) |      |     | Assaultive Trauma<br>< 10 y (n = 111) |      |     | Sexual Assaultive<br>Trauma < 10 y (n = 121) |      |     |
|------------------|-------------------------------------------|------|-----|---------------------------------------|------|-----|----------------------------------------------|------|-----|
|                  | B                                         | SE   | p   | B                                     | SE   | p   | B                                            | SE   | p   |
| Go accuracy      | 0.01                                      | 0.01 | .50 | -0.01                                 | 0.02 | .63 | 0.00                                         | 0.02 | .77 |
| No-go accuracy   | -0.01                                     | 0.00 | .06 | 0.00                                  | 0.01 | .91 | 0.00                                         | 0.01 | .68 |
| Go reaction time | -2.83                                     | 2.00 | .16 | -6.73                                 | 3.61 | .06 | 0.399                                        | 3.37 | .91 |

Note: Comparison groups are participants who were not exposed to any trauma type before 10 years of age. SE = standard error.

**TABLE S4** Associations of Early Trauma Exposure and Go/No-Go Event-Related Oscillations (Frontal Theta and Posterior Delta Power) From Baseline Through Follow-Up 4

|                                   | Intercept |      |      | Slope |       |      |
|-----------------------------------|-----------|------|------|-------|-------|------|
|                                   | B         | SE   | p    | B     | SE    | p    |
| Condition: no-go frontal theta    |           |      |      |       |       |      |
| Female gender                     | -2.60     | 1.55 | .093 | -0.03 | 0.07  | .696 |
| Race/ethnicity (reference, white) | -1.59     | 1.53 | .299 | 0.01  | 0.07  | .926 |
| Non-assaultive                    | -0.29     | 1.50 | .847 | -0.01 | 0.07  | .932 |
| Assaultive                        | -2.58     | 1.56 | .099 | 0.09  | 0.07  | .198 |
| Sexual assaultive*                | -4.41     | 1.59 | .005 | 0.22  | 0.07  | .001 |
| Condition: go frontal theta       |           |      |      |       |       |      |
| Female gender                     | -0.02     | 0.12 | .873 | -0.00 | 0.01  | .866 |
| Race/ethnicity (reference, white) | -0.15     | 0.10 | .124 | -0.01 | 0.01  | .048 |
| Non-assaultive                    | 0.10      | 0.16 | .507 | 0.01  | 0.01  | .219 |
| Assaultive                        | 0.32      | 0.33 | .336 | -0.02 | 0.02  | .254 |
| Sexual assaultive                 | 0.32      | 0.23 | .174 | -0.01 | 0.01  | .203 |
| Condition: no-go posterior delta  |           |      |      |       |       |      |
| Female gender                     | 0.02      | 0.33 | .948 | 0.00  | 0.02  | .972 |
| Race/ethnicity (reference, white) | -0.29     | 0.27 | .097 | 0.00  | 0.01  | .842 |
| Non-assaultive                    | 0.33      | 0.44 | .756 | -0.02 | 0.02  | .348 |
| Assaultive                        | -0.63     | 0.87 | .715 | 0.02  | 0.04  | .550 |
| Sexual assaultive                 | -0.35     | 0.73 | .483 | 0.02  | 0.04  | .609 |
| Condition: go posterior delta     |           |      |      |       |       |      |
| Female gender                     | 0.00      | 0.35 | .992 | 0.00  | 0.02  | .914 |
| Race/ethnicity (reference, white) | -0.31     | 0.28 | .270 | 0.00  | 0.33  | .744 |
| Non-assaultive                    | 0.94      | 0.44 | .051 | -0.05 | -2.07 | .052 |
| Assaultive                        | -0.07     | 0.92 | .941 | 0.01  | 0.16  | .875 |
| Sexual assaultive                 | 0.41      | 0.67 | .547 | -0.02 | -0.57 | .570 |

Note: All models include age modeled by time scores, gender, and self-reported race/ethnicity. SE = standard error.

\*p < .05.
